# Supplementary material for: Hand to Mouth in a Neandertal: Right-Handedness in Regourdou 1
Source: PLoS One. 2012 Aug 22;7(8):e43949. doi: 10.1371/journal.pone.0043949 (PMC3425541; doi:10.1371/journal.pone.0043949)
Supplement: Data File S2 — Raw data in Microsoft Xls format for dental scratch analysis on right canine. (XLS) [file pone.0043949.s005.xls]

## Sheet: Cdx_linee
id	Length	Angle
4	0.275	40.067
7	0.276	81.421
2	0.349	39.11
9	0.377	95.188
11	0.38	151.213
10	0.404	141.1
5	0.41	78.6
40	0.431	80.939
29	0.432	120.555
3	0.44	71.019
26	0.444	106.66
6	0.445	79.233
28	0.461	110.481
8	0.471	174.797
41	0.515	122.923
24	0.529	107.758
4	0.53	75.806
11	0.53	90
39	0.541	16.392
34	0.55	70.961
1	0.554	40.039
8	0.574	166.369
42	0.599	14.813
25	0.626	107.418
36	0.641	111.117
37	0.684	32.265
6	0.704	94.888
38	0.743	107.383
16	0.749	84.154
15	0.765	87.989
33	0.775	73.404
21	0.806	99.765
3	0.815	37.336
43	0.832	97.655
20	0.845	105.907
18	0.851	85.398
46	0.86	110.944
13	0.902	92.778
2	0.912	66.674
7	0.921	169.295
45	0.922	97.991
12	0.936	92.653
30	0.948	96.183
19	0.968	99.132
22	1	64.714
44	1.008	90
17	1.022	100.102
31	1.034	26.428
5	1.091	94.937
35	1.115	40.621
27	1.16	108.632
9	1.177	99.178
1	1.193	85.762
32	1.204	73.504
23	1.232	107.793
10	1.261	87.644
14	1.261	93.504
