# Supplementary material for: Hand to Mouth in a Neandertal: Right-Handedness in Regourdou 1
Source: PLoS One. 2012 Aug 22;7(8):e43949. doi: 10.1371/journal.pone.0043949 (PMC3425541; doi:10.1371/journal.pone.0043949)
Supplement: Data File S5 — Raw data in Microsoft Xls format for dental scratch analysis on left second incisor. (XLS) [file pone.0043949.s008.xls]

## Sheet: I2sx_linee
id	Length	Angle
72	0.024	26.565
71	0.057	15.812
46	0.158	53.967
101	0.16	26.485
73	0.172	30.45
34	0.174	134.843
90	0.177	49.214
103	0.201	41.398
45	0.211	53.132
47	0.219	33.549
35	0.222	120.419
50	0.228	139.165
30	0.236	132.553
100	0.243	8.345
91	0.245	43.511
52	0.252	173.393
37	0.268	116.63
58	0.275	18.229
104	0.284	28.144
79	0.293	134.945
3	0.297	159.091
99	0.3	49.811
22	0.304	4.529
80	0.304	164.803
25	0.324	59.494
51	0.331	22.913
78	0.345	11.887
97	0.346	5.935
20	0.347	177.871
49	0.348	3.943
21	0.351	176.084
23	0.352	175.137
27	0.365	177.989
64	0.376	25.506
70	0.376	55.571
102	0.383	166.6
38	0.388	133.614
67	0.389	157.692
32	0.391	57.056
9	0.392	62.423
39	0.397	128.87
41	0.4	21.787
86	0.404	6.319
96	0.408	21.594
75	0.422	10.854
48	0.427	164.026
42	0.447	54.22
16	0.452	41.063
14	0.46	48.576
89	0.46	11.091
98	0.466	62.961
69	0.473	56.307
94	0.473	15.338
82	0.482	22.726
29	0.489	111.005
11	0.49	8.347
5	0.495	165.457
19	0.516	56.982
26	0.52	173.473
40	0.531	47.09
93	0.531	6.77
44	0.541	45.161
18	0.542	10.707
92	0.551	177.224
17	0.568	178.701
43	0.568	52.593
24	0.576	31.953
88	0.621	6.599
1	0.624	164.044
61	0.651	27.955
15	0.655	176.348
36	0.665	58.539
95	0.689	5.196
57	0.743	42.401
31	0.747	52.443
55	0.754	55.315
83	0.756	4.03
63	0.761	27.938
8	0.767	0
77	0.772	156.086
33	0.773	54.383
87	0.779	38.052
4	0.788	177.54
81	0.791	12.317
68	0.81	48.561
66	0.825	168.165
54	0.829	53.803
84	0.832	4.84
10	0.846	3.627
85	0.858	45
12	0.884	18.811
7	0.912	61.283
60	0.966	23.259
28	0.969	52.823
13	1.047	14.43
76	1.086	33.953
59	1.094	28.355
62	1.115	43.051
6	1.193	59.875
56	1.23	23.358
53	1.239	73.835
65	1.397	35.848
74	1.528	13.146
2	1.673	35.603
