# Supplementary material for: Hand to Mouth in a Neandertal: Right-Handedness in Regourdou 1
Source: PubMed Central journal article supplement (PMC3425541; doi:10.1371/journal.pone.0043949), 2012-08-22
Supplement: pone.0043949.s002.pdf [file pone.0043949.s002.pdf]

**R Canine**

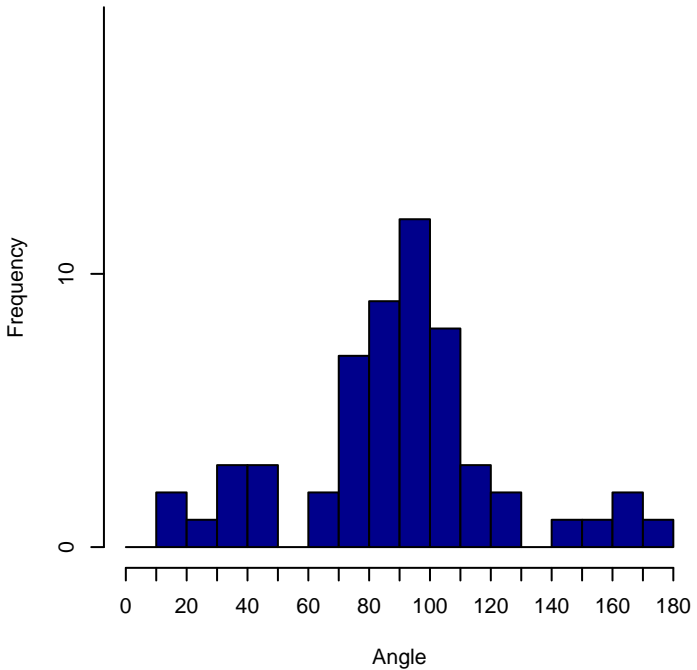

**R Lateral Incisor**

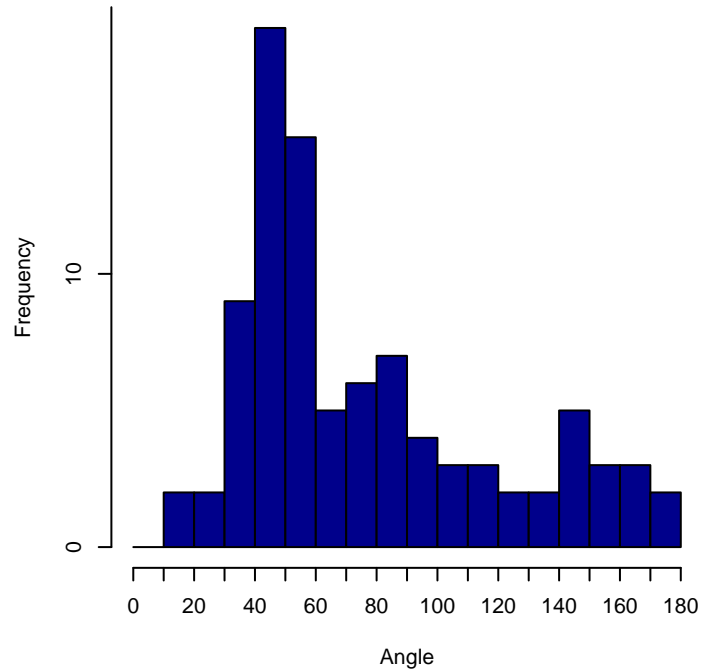

**R Central Incisor**

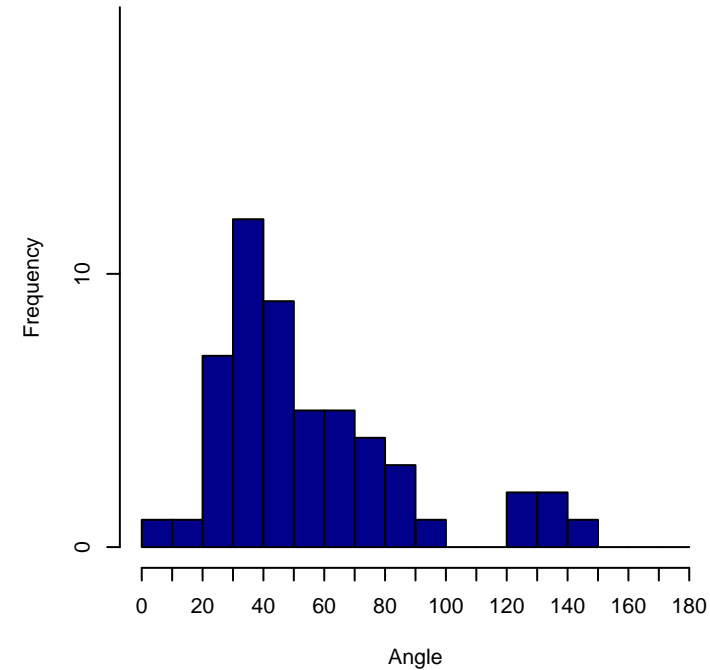

**L Central Incisor**

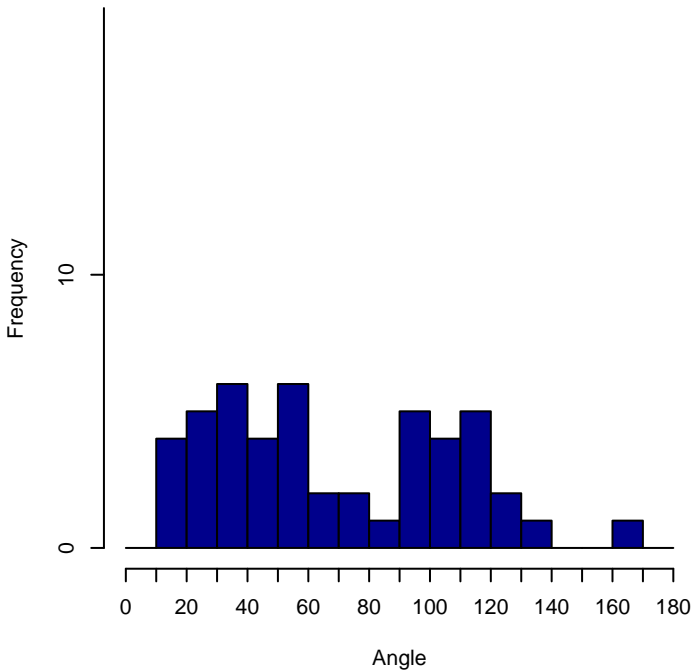

**L Lateral Incisor**

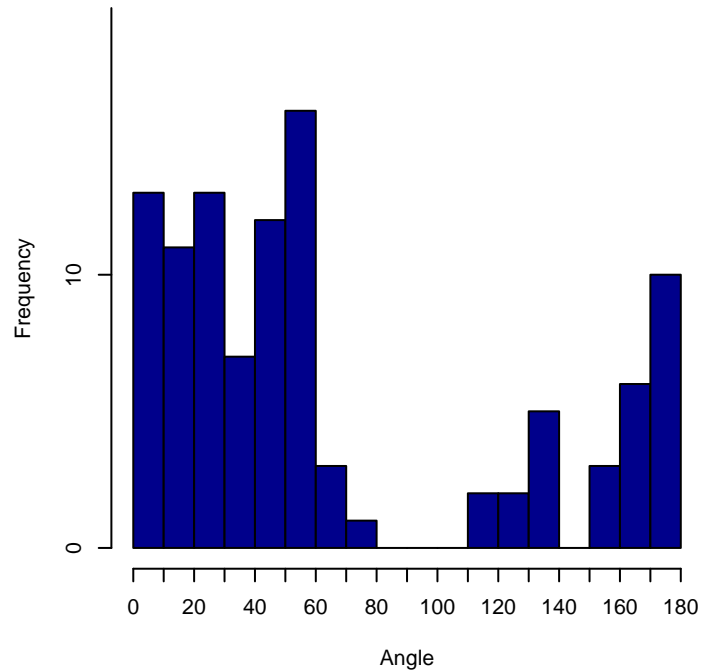

**L Canine**

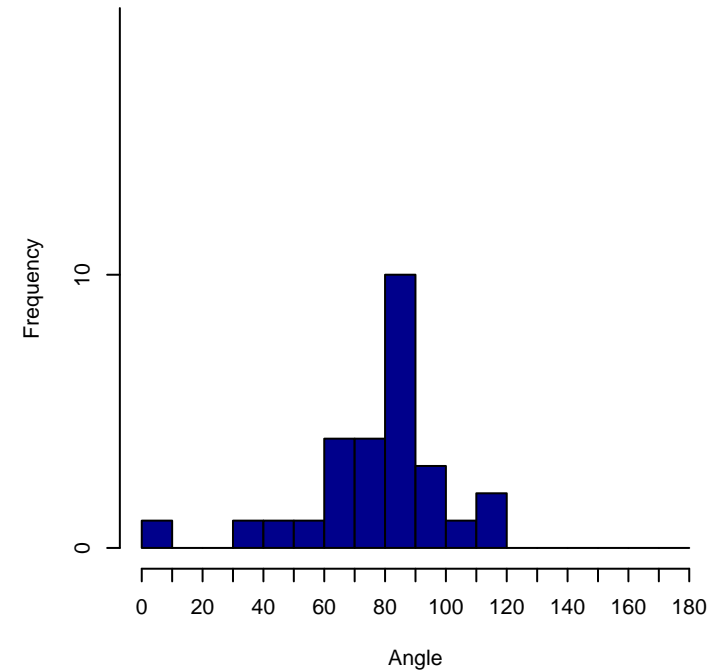

**R Canine -  $r = -0.03$**

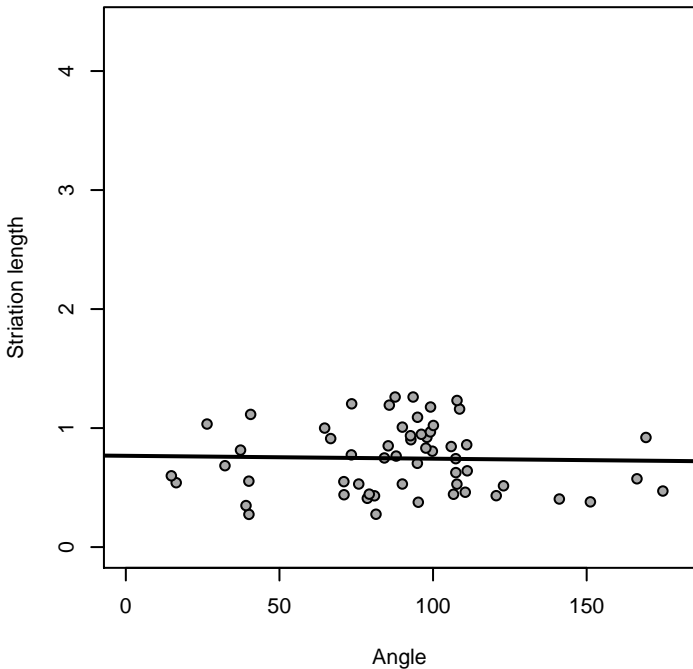

**R Lateral Incisor -  $r = -0.16$**

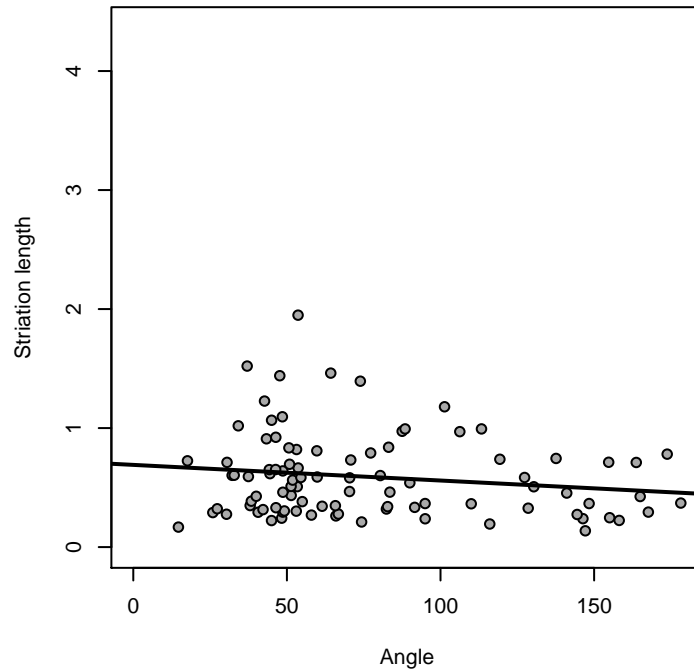

**R Central Incisor -  $r = -0.12$**

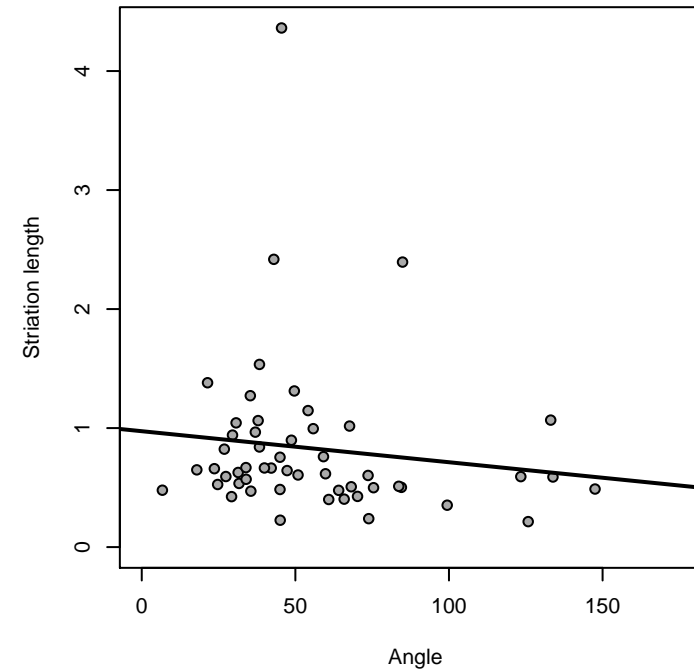

**L Central Incisor -  $r = 0.07$**

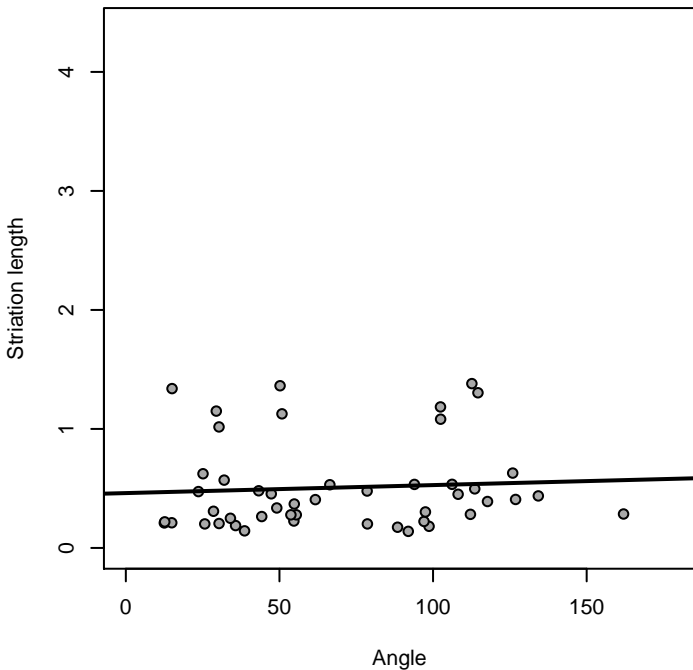

**L Lateral Incisor -  $r = -0.19$**

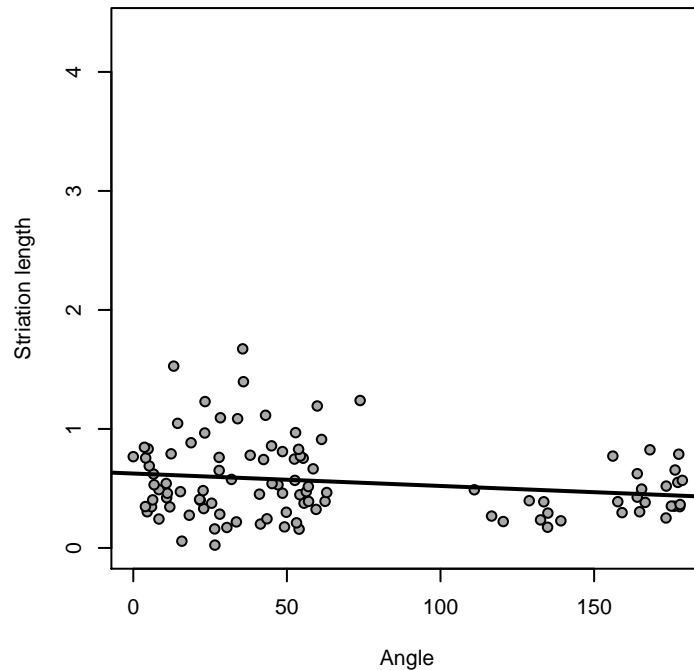

**L Canine -  $r = -0.06$**

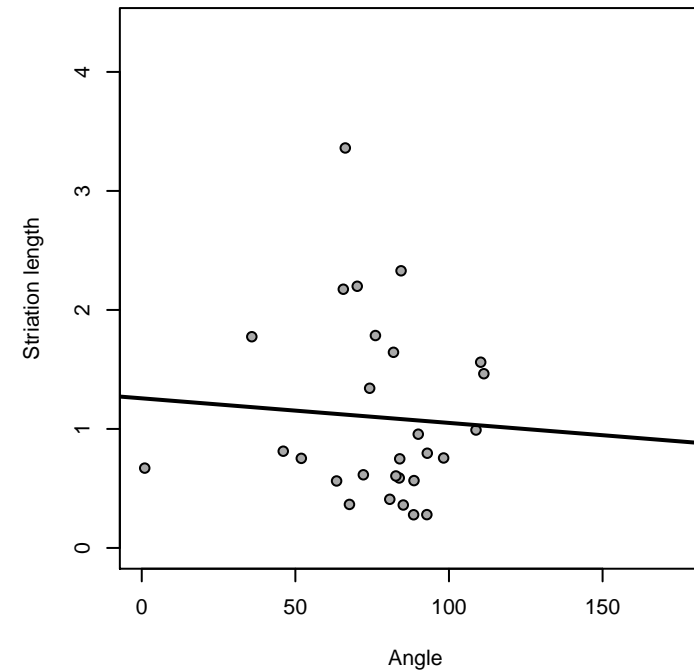

R Canine

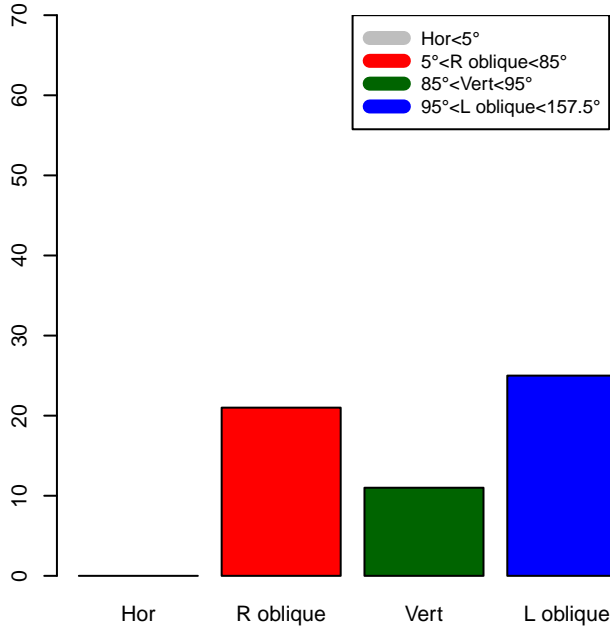

R Lateral Incisor

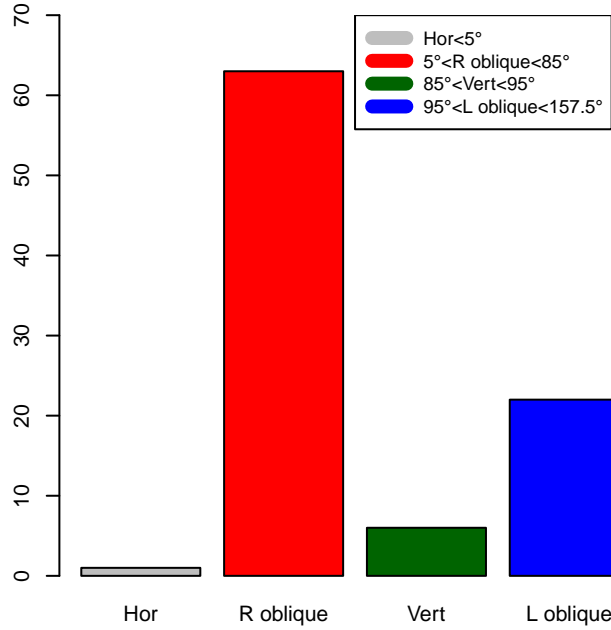

R Central Incisor

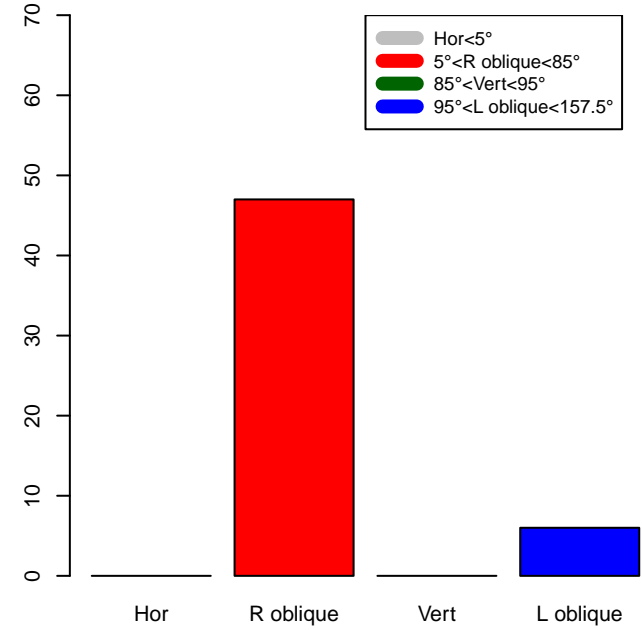

L Central Incisor

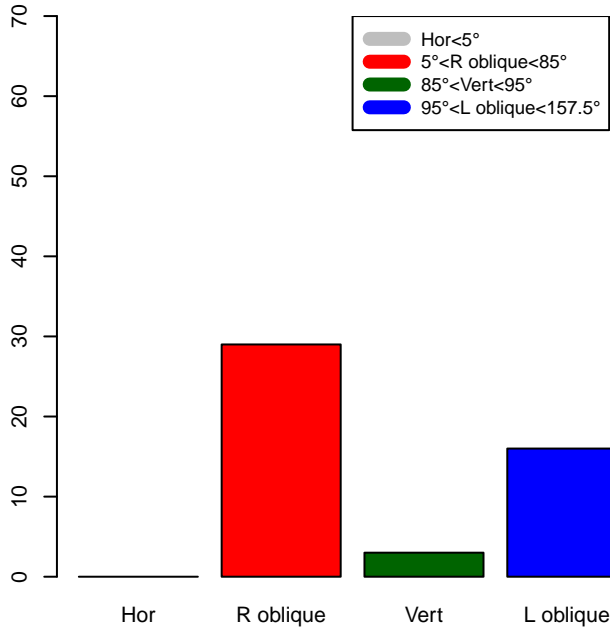

L Lateral Incisor

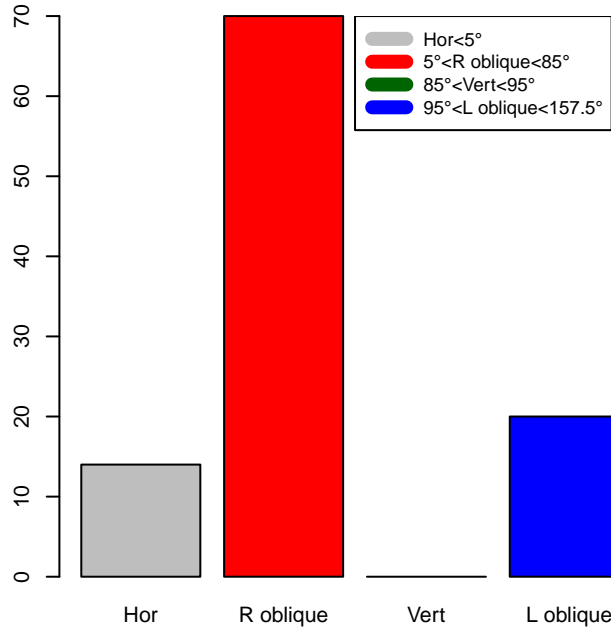

L Canine

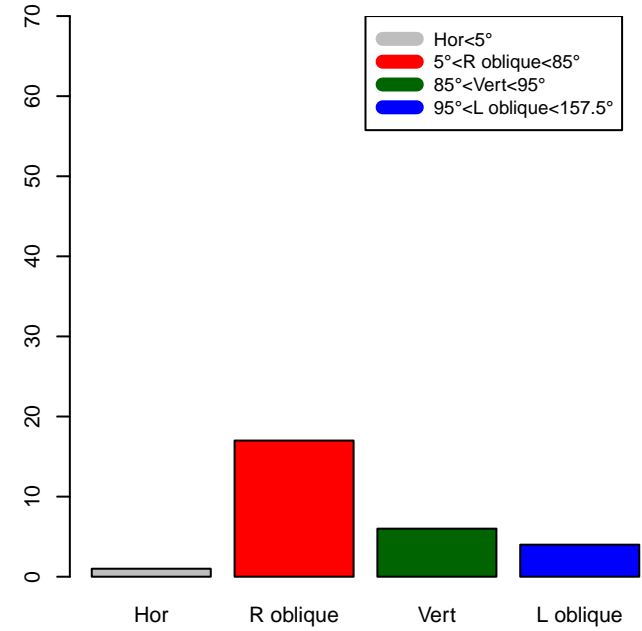

**R Canine**

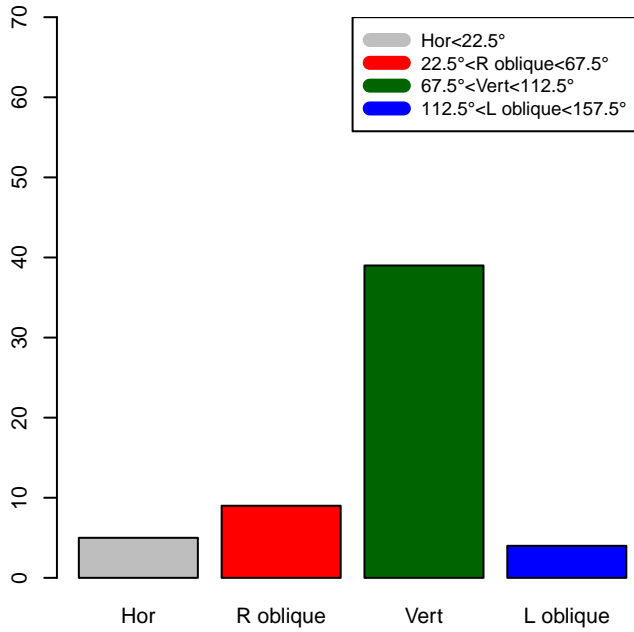

**R Lateral Incisor**

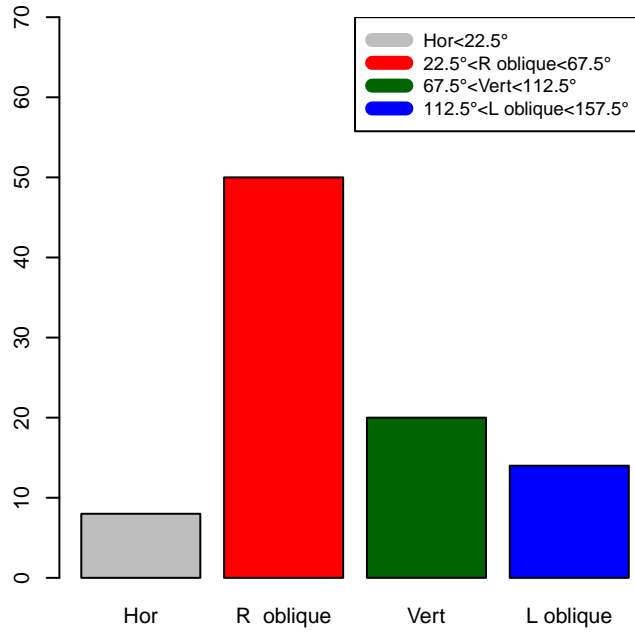

**R Central Incisor**

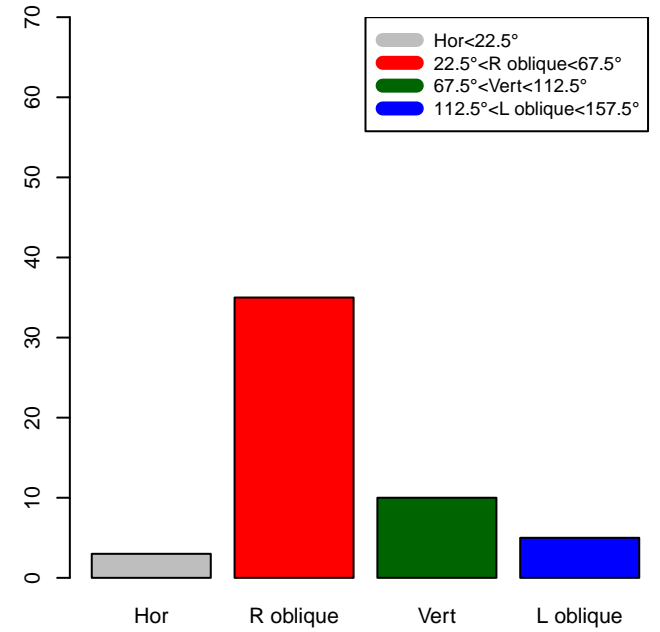

**L Central Incisor**

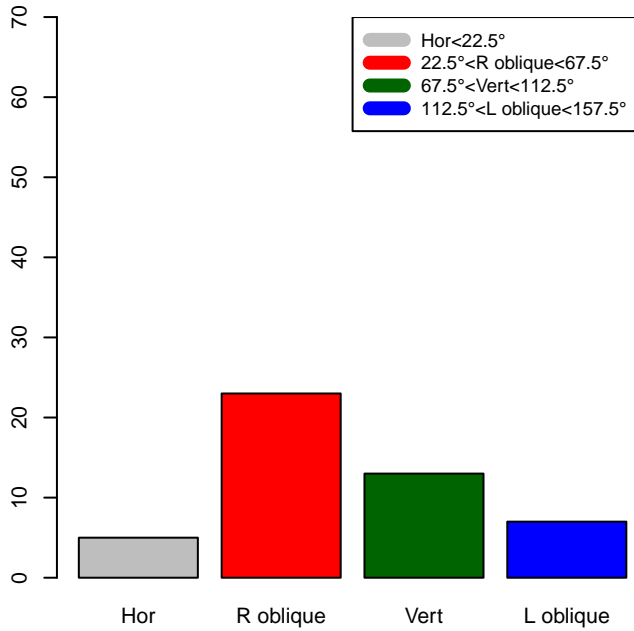

**L Lateral Incisor**

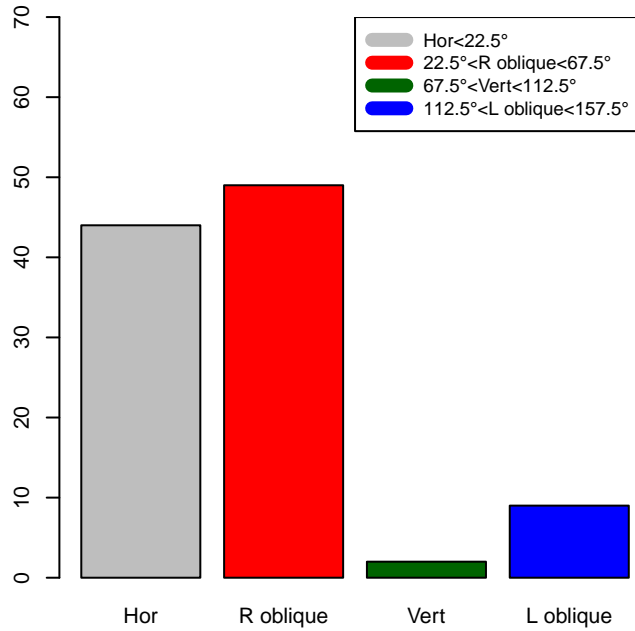

**L Canine**

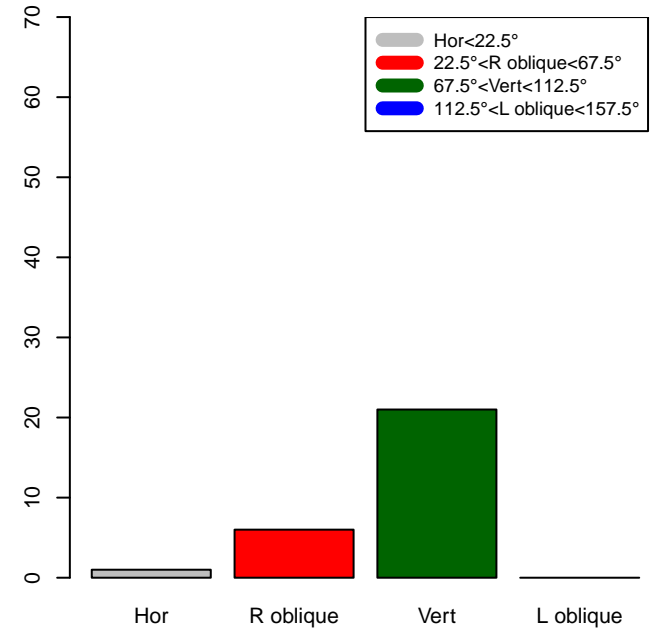

Striae orientation by tooth

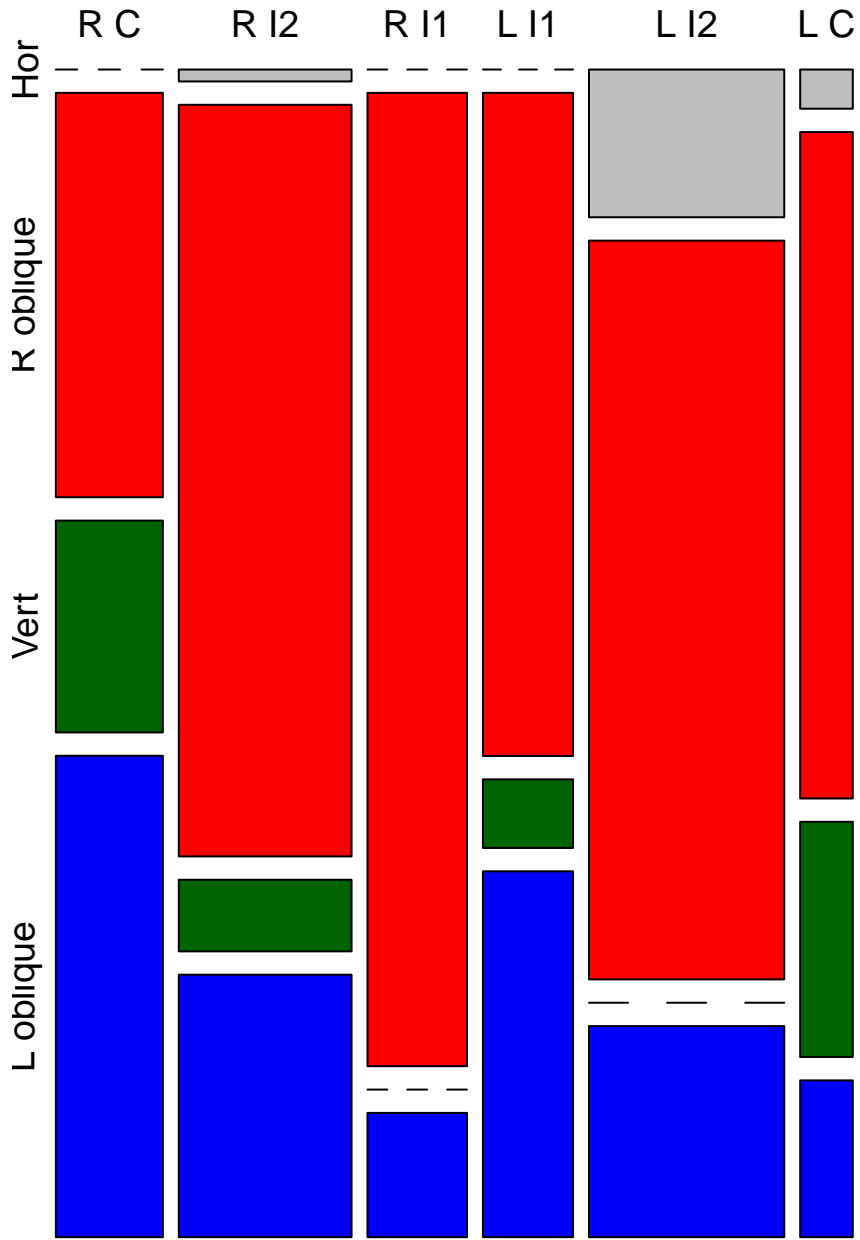

Hor<5°; 5°<R oblique<85°; 85°<Vert<95°; 95°<L oblique<157.5°

Striae orientation by tooth

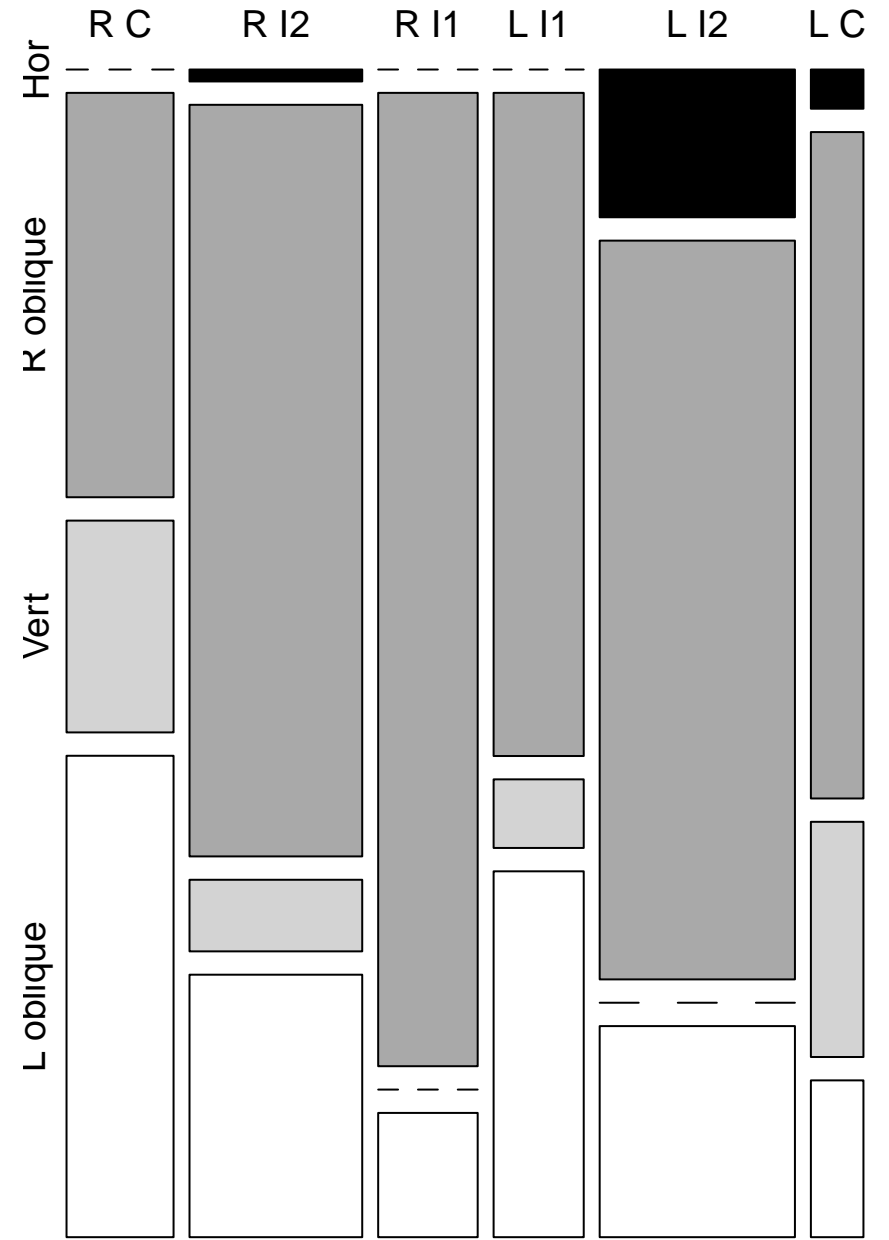

Hor<5°; 5°<R oblique<85°; 85°<Vert<95°; 95°<L oblique<157.5°

**Striae orientation by tooth**

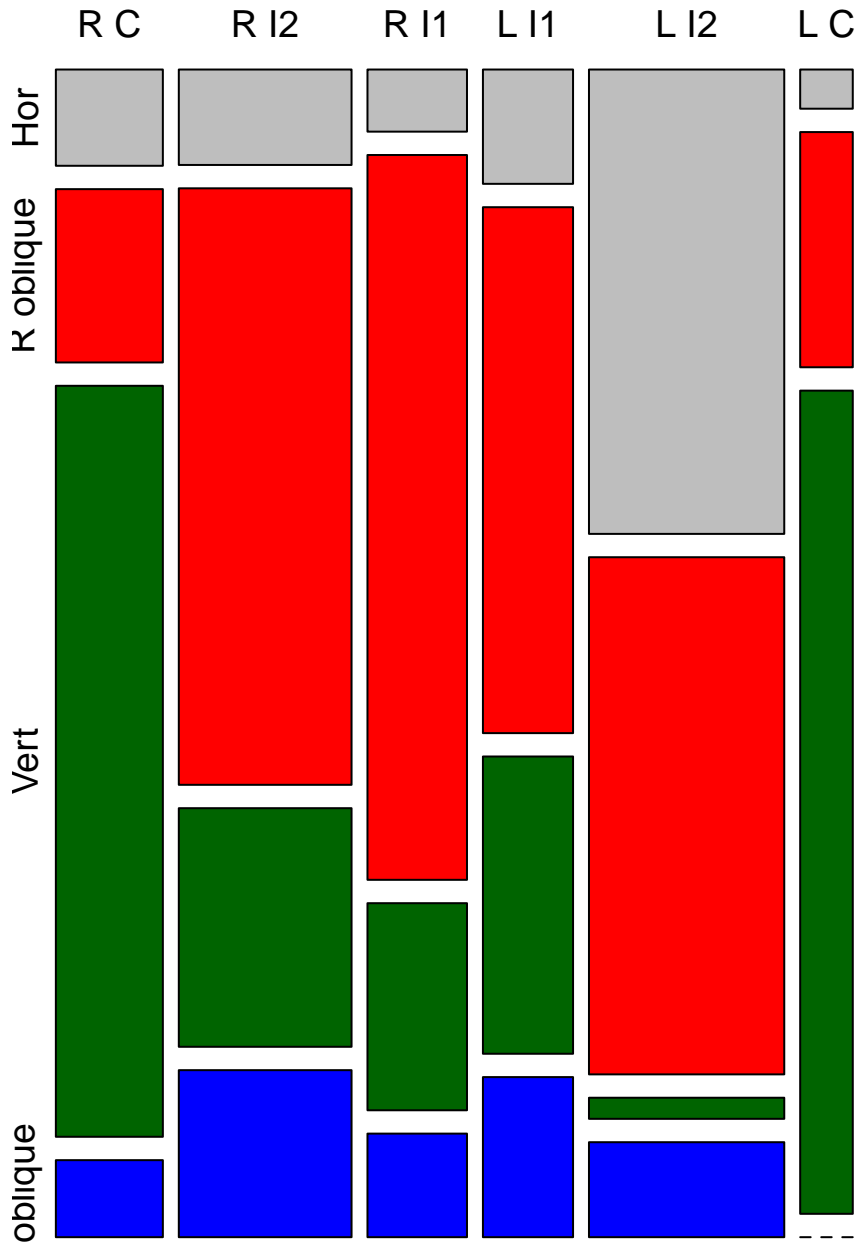

Hor<22.5°; 22.5°<R oblique<67.5°; 67.5°<Vert<112.5°; 112.5°<L oblique<157.5°

**Striae orientation by tooth**

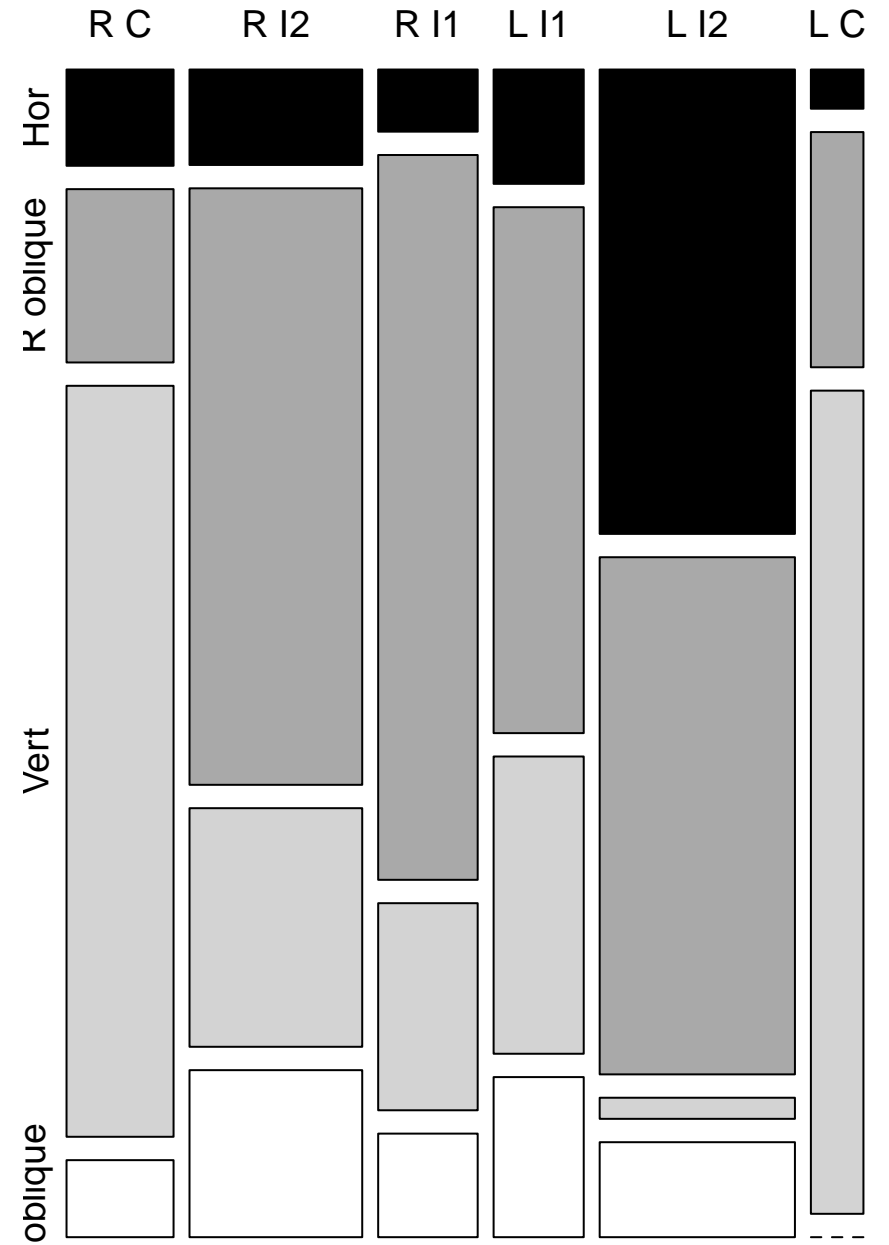

Hor<22.5°; 22.5°<R oblique<67.5°; 67.5°<Vert<112.5°; 112.5°<L oblique<157.5°
